# Supplementary material
Source: publisher site journal article supplement (http://www.dovepress.com/get_supplementary_file.php?f=289869.docx)

**Supplementary Table 1. Patients´ phenotype**

| **ID** | **Age (years)** | **Gender** | **Drug** | **Onset (days)** | **Clinical features** | **TBSA injury (%)** | **Phenotype** |
| --- | --- | --- | --- | --- | --- | --- | --- |
| **SJS-2** | 59 | Male | Urtica dioica | 5 | Fever, ocular and oral mucosa involvement, Rash without flictenas,loss of lingual papillae. | 20 | SJS/TEN |
| **SJS-4** | 46 | Female | Lamotrigine | 9 | Leukocytosis fever, oral and genital mucosa involvement, Rash without flictenas | 70 | TEN |
| **SJS-5** | 48 | Female | Contrast medium | 1 | Oral and genital mucosa involvement, Rash without flictenas,  the patient reports multiple episodes of SJS | 10 | SJS |
| **SJS-6** | 68 | Female | Carbamazepine | 7 | Oral, ocular and genital mucosal involvement, rash and flictenas | 80 | TEN |
| **SJS-12** | 36 | Female | Carbamazepine | 20 | Leukocytosis and ocular mucosal involvement and erythema. Rash without flictenas | 20 | SJS/TEN |
| **SJS-13** | 5 | Male | Carbamazepine | 6 | Leukocytosis, fever, oral and ocular mucosal involvement, erythema, rash and flictenas | 80 | TEN |
| **SJS-14** | 18 | Male | Carbamazepine | 7 | Leukocytosis, fever, oral,ocular and genital mucosal involvement. Rash, flictenas and  erythema on the face, chest and extremities. | 80 | TEN |
| **SJS-16** | 9 | Male | Metoclopramide | Not Referred | Fever, oral and genital mucosal involvement, rash without flictenas, Erythema on the back and facial edema | 80 | TEN |
| **SJS-17** | 5 | Male | Lamotrigine | 8 | Leukocytosis, fever, vesicobullous lesions on the skin and oral cavity. Required intensive care unit management and mechanical ventilation. | 80 | TEN |
| **SJS-18** | 28 | Female | Pyrimethamine sulfadoxine | Not referred | Fever, arthralgias, ocular and oral muscosal involvement and rash. | 80 | TEN |
| **SJS-19** | 1 | Male | Pyrimethamine sulfadoxine | Not referred | Ocuar mucosal involvement and skin lesions | 10 | SJS |

**Supplementary Table 2: Gene subsets**

| ***Transcription Factors Subset genes (TF)*** | |
| --- | --- |
| **Gene** | **Name** |
| *E2F1* | E2F Transcription Factor 1 |
| *E2F3* | E2F Transcription Factor 3 |
| *E2F5* | E2F Transcription Factor 5 |
| *E2F7* | E2F Transcription Factor 7 |
| *TFDP1* | Transcription Factor Dp-1 |
| *TFDP3* | Transcription Factor Dp Family Member 3 |
| *E2F2* | E2F Transcription Factor 2 |
| *E2F4* | E2F Transcription Factor 4 |
| *E2F6* | E2F Transcription Factor 6 |
| *E2F8* | E2F Transcription Factor 8 |
| *TFDP2* | Transcription Factor Dp-2 |
| *ZBTB14* | Zinc Finger And BTB Domain-Containing Protein 14 |
| *CDCA7L* | Cell Division Cycle-Associated 7-Like Protein |
| *KLF10* | Kruppel Like Factor 10 |
| *KLF16* | Kruppel Like Factor 1 |
| *SP2* | Sp2 Transcription Factor |
| *EAPP* | E2F Associated Phosphoprotein |
| *KLF11* | Kruppel Like Factor 11 |
| *SP1* | Sp1 Transcription Factor |
| *SP3* | Sp3 Transcription Factor |
| *SP4* | Sp4 Transcription Factor |
| *SP5* | Sp5 Transcription Factor |
| *SP6* | Sp6 Transcription Factor |
| *SP7* | Sp7 Transcription Factor |
| *CDE* | cell cycle-dependent element |
| *NRF1* | Nuclear Respiratory Factor 1 |
| *LRRFIP1* | Leucine-Rich Repeat Flightless-Interacting Protein 1 |
| *EGR1* | Early Growth Response Protein 1 |
| *EGR2* | Early Growth Response Protein 2 |
| *EGR3* | Early Growth Response Protein 3 |
| *EGR4* | Early Growth Response Protein 4 |
| *WT1* | WT1 Transcription Factor |
| *GTF2B* | General Transcription Factor IIB |
| *ZBED4* | Zinc Finger BED Domain-Containing Protein 4 |
| *DMTE* | Adenine-specific DNA methyltransferase |
| *KLF1* | Kruppel Like Factor 1 |
| *KLF2* | Kruppel Like Factor 2 |
| *KLF3* | Kruppel Like Factor 3 |
| *KLF4* | Kruppel Like Factor 4 |
| *KLF5* | Kruppel Like Factor 5 |
| *KLF6* | Kruppel Like Factor 6 |
| *KLF7* | Kruppel Like Factor 7 |
| *KLF8* | Kruppel Like Factor 8 |
| *KLF9* | Kruppel Like Factor 9 |
| *KLF12* | Kruppel Like Factor 12 |
| *KLF13* | Kruppel Like Factor 13 |
| *KLF15* | Kruppel Like Factor 15 |
| *KLF17* | Kruppel Like Factor 17 |
| *AHR* | Aryl Hydrocarbon Receptor |
| *NPAS4* | Neuronal PAS Domain Protein 4 |
| *SIM2* | Single-Minded Family BHLH Transcription Factor 2 |
| *ARNT* | Aryl Hydrocarbon Receptor Nuclear Translocator |
| *SIM1* | Single-Minded Family BHLH Transcription Factor 1 |
| *SLC2A4RG* | SLC2A4 Regulator |
| *ZNF395* | Zinc Finger Protein 395 |
| *FOXN1* | Forkhead Box N1 |
| *FOXN4* | Forkhead Box N4 |
| *ZBTB33* | Zinc Finger And BTB Domain-Containing Protein 33 |
| *ATF6* | Activating Transcription Factor 6 |
| *MAX* | MYC Associated Factor X |
| *MLX* | MAX Dimerization Protein |
| *MLXIPL* | MLX Interacting Protein Like |
| *MXD3* | MAX Dimerization Protein 3 |
| *MXI1* | MAX Interactor 1, Dimerization Protein |
| *MYCL* | MYCL Proto-Oncogene, BHLH Transcription Factor |
| *MYCN* | MYCN Proto-Oncogene, BHLH Transcription Factor |
| *TCFL5* | Transcription Factor Like 5 |
| *USF2* | Upstream Transcription Factor 2, C-Fos Interacting |
| *ATF6B* | Activating Transcription Factor 6 Beta |
| *MGA* | MAX Dimerization Protein MGA |
| *MLXIP* | MLX Interacting Protein |
| *MNT* | MAX Network Transcriptional Repressor |
| *MXD4* | Max-Interacting Transcriptional Repressor MAD4 |
| *MYC* | MYC Proto-Oncogene, BHLH Transcription Factor |
| *MYCLP1* | V-Myc Avian Myelocytomatosis Viral Oncogene Homolog 1 Pseudogene 1 |
| *TCF3* | Transcription Factor 3 |
| *USF1* | Upstream Transcription Factor 1 |
| *BHLHE40* | Basic Helix-Loop-Helix Family Member E40 |
| *CCDC169* | Coiled-Coil Domain Containing 169 protein |
| *HELT* | Helt BHLH Transcription Factor |
| *HES2* | Hes Family BHLH Transcription Factor 2 |
| *HES4* | Hes Family BHLH Transcription Factor 4 |
| *HES6* | Hes Family BHLH Transcription Factor 6 |
| *HEY1* | Hes Related Family BHLH Transcription Factor With YRPW Motif 1 |
| *HEYL* | Hes Related Family BHLH Transcription Factor With YRPW Motif Like |
| *SOHLH1* | Spermatogenesis And Oogenesis Specific Basic Helix-Loop-Helix 1 |
| *BHLHE41* | Basic Helix-Loop-Helix Family Member E41 |
| *CCDC169-SOHLH2* | CCDC169-SOHLH2 Readthrough |
| *HES1* | Hes Family BHLH Transcription Factor 1 |
| *HES3* | Hes Family BHLH Transcription Factor 3 |
| *HES5* | Hes Family BHLH Transcription Factor 5 |
| *HES7* | Hes Family BHLH Transcription Factor 7 |
| *HEY2* | Hes Related Family BHLH Transcription Factor With YRPW Motif 2 |
| *ITGB3BP* | Integrin Subunit Beta 3 Binding Protein |
| *SOHLH2* | Spermatogenesis And Oogenesis Specific Basic Helix-Loop-Helix 2 |
| *CTCF* | CCCTC-Binding Factor |
| *CTCFL* | CCCTC-Binding Factor Like |
| *POU2F1* | POU Domain, Class 2, Transcription Factor 1 |
| *POU2F2* | POU Domain, Class 2, Transcription Factor 2 |
| *POU2F3* | POU Domain, Class 2, Transcription Factor 3 |
| *POU3F3* | POU Domain, Class 3, Transcription Factor 3 |
| *DLX1* | Distal-Less Homeobox 1 |
| *DLX2* | Distal-Less Homeobox 2 |
| *DLX3* | Distal-Less Homeobox 3 |
| *DLX4* | Distal-Less Homeobox 4 |
| *DLX5* | Distal-Less Homeobox 5 |
| *DLX6* | Distal-Less Homeobox 6 |
| *BRN5* | POU Class 6 Homeobox 1 |
| *POU3F1* | POU Class 3 Homeobox 1 |
| *POU3F2* | POU Class 3 Homeobox 2 |
| *POU3F4* | POU Class 3 Homeobox 4 |
| *POU4F1* | POU Class 4 Homeobox 1 |
| *POU4F2* | POU Class 4 Homeobox 2 |
| *POU4F3* | POU Class 4 Homeobox 3 |
| *SOX1* | SRY-Box Transcription Factor 1 |
| *SOX2* | SRY-Box Transcription Factor 2 |
| *SOX3* | SRY-Box Transcription Factor 3 |
| *SOX4* | SRY-Box Transcription Factor 4 |
| *SOX5* | SRY-Box Transcription Factor 5 |
| *SOX6* | SRY-Box Transcription Factor 6 |
| *SOX7* | SRY-Box Transcription Factor 7 |
| *SOX8* | SRY-Box Transcription Factor 8 |
| *SOX9* | SRY-Box Transcription Factor 9 |
| *SOX10* | SRY-Box Transcription Factor 10 |
| *SOX11* | SRY-Box Transcription Factor 11 |
| *SOX12* | SRY-Box Transcription Factor 12 |
| *SOX13* | SRY-Box Transcription Factor 13 |
| *SOX14* | SRY-Box Transcription Factor 14 |
| *SOX15* | SRY-Box Transcription Factor 15 |
| *SOX17* | SRY-Box Transcription Factor 17 |
| *SOX18* | SRY-Box Transcription Factor 18 |
| *SOX21* | SRY-Box Transcription Factor 21 |
| *SOX30* | SRY-Box Transcription Factor 30 |
| *SOX5P1* | SOX5 Pseudogene 1 |
| *SRY* | Sex Determining Region Y |
| *TOX* | Thymocyte Selection Associated High Mobility Group Box |
| *HMGB3P1* | High Mobility Group Box 3 Pseudogene 1 |
| *HMGA1* | High Mobility Group AT-Hook 1 |
| *HMGA2* | High Mobility Group AT-Hook 2 |
| *CIC* | Capicua Transcriptional Repressor |
| *HBP1* | HMG-Box Transcription Factor 1 |
| ***Pharmacogenetics subset genes (PH)*** | |
| ***Lamotrigine*** | |
| *CACNA1E* | Voltage-dependent R-type calcium channel subunit alpha-1E |
| *SCN2A* | Sodium channel protein type 2 subunit alpha |
| *ADORA1* | Adenosine receptor A1 |
| *ADORA2A* | Adenosine receptor A2a |
| *ADRA1A* | Alpha-1A adrenergic receptor |
| *ADRA2A* | Alpha-2A adrenergic receptor |
| *ADRB1* | Beta-1 adrenergic receptor |
| *DRD2* | D(2) dopamine receptor |
| *GABRA1* | Gamma-Aminobutyric Acid Type A Receptor Alpha1 Subunit |
| *GABRA2* | Gamma-Aminobutyric Acid Type A Receptor Alpha2 Subunit |
| *GABRA3* | Gamma-Aminobutyric Acid Type A Receptor Alpha3 Subunit |
| *GABRA4* | Gamma-Aminobutyric Acid Type A Receptor Alpha4 Subunit |
| *GABRA5* | Gamma-Aminobutyric Acid Type A Receptor Alpha5 Subunit |
| *GABRA6* | Gamma-Aminobutyric Acid Type A Receptor Alpha6 Subunit |
| *GABRB1* | Gamma-Aminobutyric Acid Type A Receptor Beta1 Subunit |
| *GABRB2* | Gamma-Aminobutyric Acid Type A Receptor Beta2 Subunit |
| *GABRB3* | Gamma-Aminobutyric Acid Type A Receptor Beta3 Subunit |
| *GABRD* | Gamma-Aminobutyric Acid Type A Receptor delta Subunit |
| *GABRE* | Gamma-Aminobutyric Acid Type A Receptor Epsilon Subunit |
| *GABRG1* | Gamma-Aminobutyric Acid Type A Receptor Gamma1 Subunit |
| *GABRG2* | Gamma-Aminobutyric Acid Type A Receptor Gamma2 Subunit |
| *GABRG3* | Gamma-Aminobutyric Acid Type A Receptor Gamma3 Subunit |
| *GABRP* | Gamma-Aminobutyric Acid Type A Receptor Pi Subunit |
| *GABRQ* | Gamma-Aminobutyric Acid Type A Receptor Theta Subunit |
| *HRH1* | Histamine H1 receptor |
| *OPRK1* | Kappa-type opioid receptor |
| *CHRM1* | Cholinergic Receptor Muscarinic 1 |
| *CHRM2* | Cholinergic Receptor Muscarinic 2 |
| *CHRM3* | Cholinergic Receptor Muscarinic 3 |
| *CHRM4* | Cholinergic Receptor Muscarinic 4 |
| *CHRM5* | Cholinergic Receptor Muscarinic 5 |
| *HTR2A* | 5-hydroxytryptamine receptor 2A |
| *HTR3A* | 5-hydroxytryptamine receptor 3A |
| *UGT1A4* | UDP-glucuronosyltransferase 1-4 |
| *DHFR* | Dihydrofolate reductase |
| *UGT1A3* | UDP-glucuronosyltransferase 1-3 |
| *UGT1A1* | UDP-glucuronosyltransferase 1-1 |
| *ABCB1* | Multidrug resistance protein 1 |
| *SLC22A2* | Solute carrier family 22 member 2 |
| ***Carbamazepine*** | |
| *SCN1A* | Sodium channel protein type 1 subunit alpha |
| *SCN2A* | Sodium channel protein type 2 subunit alpha |
| *SCN3A* | Sodium channel protein type 3 subunit alpha |
| *SCN4A* | Sodium channel protein type 4 subunit alpha |
| *SCN5A* | Sodium channel protein type 5 subunit alpha |
| *SCN7A* | Sodium channel protein type 7 subunit alpha |
| *SCN8A* | Sodium channel protein type 8 subunit alpha |
| *SCN9A* | Sodium channel protein type 9 subunit alpha |
| *SCN10A* | Sodium channel protein type 10 subunit alpha |
| *SCN11A* | Sodium channel protein type 11 subunit alpha |
| *CHRNA4* | Neuronal acetylcholine receptor subunit alpha-4 |
| *NR1I2* | Nuclear receptor subfamily 1 group I member 2 |
| *CYP3A4* | Cytochrome P450 3A4 |
| *CYP2C8* | Cytochrome P450 2C8 |
| *CYP1A2* | Cytochrome P450 1A2 |
| *CYP2C9* | Cytochrome P450 2C9 |
| *CYP2C19* | Cytochrome P450 2C19 |
| *CYP3A5* | Cytochrome P450 3A5 |
| *UGT2B7* | UDP-glucuronosyltransferase 2B7 |
| *UGT1A1* | UDP-glucuronosyltransferase 1-1 |
| *ABCB1* | Multidrug resistance protein 1 |
| *RALBP1* | RalA-binding protein 1 |
| *ABCC2* | Canalicular multispecific organic anion transporter 1 |
| ***Metoclopramide*** | |
| *DRD2* | D(2) dopamine receptor |
| *CHRM1* | Muscarinic acetylcholine receptor M1 |
| *HTR4* | 5-hydroxytryptamine receptor 4 |
| *HTR3A* | 5-hydroxytryptamine receptor 3A |
| *CYP2D6* | Cytochrome P450 2D6 |
| *CYP3A4* | Cytochrome P450 3A4 |
| *CYP1A2* | Cytochrome P450 1A2 |
| *ABCB1* | Multidrug resistance protein 1 |
| ***Pyrimethamine-Sulfadoxine*** | |
| *DHFR* | Dihydrofolate reductase |
| *HEXB* | Beta-hexosaminidase subunit beta |
| *CYP2C8* | Cytochrome P450 2C8 |
| *SLC47A1* | Multidrug and toxin extrusion protein 1 |
| *SLC47A2* | Multidrug and toxin extrusion protein 2 |
| ***Trimethoprim-sulfamethoxazole*** | |
| *TYMS* | Thymidylate synthase |
| *DHFR* | Dihydrofolate reductase |
| *CYP3A4* | Cytochrome P450 3A4 |
| *CYP2C8* | Cytochrome P450 2C8 |
| *CYP2C9* | Cytochrome P450 2C9 |
| *ABCB1* | Multidrug resistance protein 1 |
| *SLC22A2* | Solute Carrier Family 22 Member 2 |
| *GSTP1* | Glutathione S-transferase P |
| *NAT1* | Arylamine N-acetyltransferase 1 |
| *NAT2* | Arylamine N-acetyltransferase 2 |
| *CYP2C9* | Cytochrome P450 2C9 |
| *PTGS1* | Prostaglandin G/H synthase 1 |
| *UGT1A9* | UDP-glucuronosyltransferase 1-9 |
| *CYP2C8* | Cytochrome P450 2C8 |
| *CYP3A4* | Cytochrome P450 3A4 |
| *ABCB11* | Bile salt export pump |
| ***Aetiopathology subset genes (AE)*** | |
| *AKT1* | AKT Serine/Threonine Kinase 1 |
| *ANXA1* | Annexin A1 |
| *APAF-1* | Apoptotic Peptidase Activating Factor 1 |
| *APAF-1* | Apoptotic Peptidase Activating Factor 1 |
| *C-abl* | ABL Proto-Oncogene 1, Non-Receptor Tyrosine Kinase |
| *CaMKII* | Calcio calmodulina quinasa II |
| *CASP10* | Caspase 10 |
| *CASP8* | Caspase 8 |
| *CCR10* | C-C Motif Chemokine Receptor 10 |
| *CCR3* | C-C Motif Chemokine Receptor 3 |
| *CDK1* | Cyclin Dependent Kinase 1 |
| *CK2* | Protein kinase CK2 |
| *CXCR3* | C-X-C Motif Chemokine Receptor 3 |
| *CXCR4* | C-X-C Motif Chemokine Receptor 4 |
| *DIAP1* | Diaphanous Related Formin 1 |
| *DYRK1A* | Dual Specificity Tyrosine Phosphorylation Regulated Kinase 1A |
| *EP3* | Prostaglandin E Receptor 3 |
| *FADD* | Fas Associated Via Death Domain |
| *FAS* | Fas receptor |
| *FASLG* | Fas ligand |
| *c-FLIP* | Cellular FLICE-like inhibitory protein |
| *FPR1* | Formyl Peptide Receptor 1 |
| *FYN* | FYN Proto-Oncogene, Src Family Tyrosine Kinase |
| *GNLY* | Granulysin |
| *GZMB* | Granzyme B |
| *INFG* | Interferon Gamma |
| *IKZF1* | IKAROS Family Zinc Finger 1 |
| *IL 10* | Interleukin10 |
| *IL 12* | Interleukin12 |
| *IL 13* | Interleukin13 |
| *IL 15* | Interleukin15 |
| *IL 18* | Interleukin18 |
| *IL 2* | Interleukin2 |
| *IL 5* | Interleukin5 |
| *IL 6* | Interleukin6 |
| *IL4R* | Interleukin 4 Receptor |
| *KAR* | Hydroxysteroid 17-Beta Dehydrogenase 12 |
| *KIR* | Killer Cell Immunoglobulin Like Receptor, Three Ig Domains And Long Cytoplasmic Tail |
| *LYN* | LYN Proto-Oncogene, Src Family Tyrosine Kinase |
| *M6PR* | Mannose-6-Phosphate Receptor, Cation Dependent |
| *MAPK3* | Mitogen-Activated Protein Kinase 3 |
| *MLKL* | Mixed Lineage Kinase Domain Like Pseudokinase |
| *MMP-1* | Matrix Metallopeptidase 1 |
| *MMP-10* | Matrix Metallopeptidase 10 |
| *MMP-11* | Matrix Metallopeptidase 11 |
| *MMP-12* | Matrix Metallopeptidase 12 |
| *MMP-13* | Matrix Metallopeptidase 13 |
| *MMP-14* | Matrix Metallopeptidase 14 |
| *MMP-15* | Matrix Metallopeptidase 15 |
| *MMP-16* | Matrix Metallopeptidase 16 |
| *MMP-17* | Matrix Metallopeptidase 17 |
| *MMP-19* | Matrix Metallopeptidase 19 |
| *MMP-2* | Matrix Metallopeptidase 2 |
| *MMP-20* | Matrix Metallopeptidase 20 |
| *MMP-21* | Matrix Metallopeptidase 21 |
| *MMP-22* | Matrix Metallopeptidase 22 |
| *MMP-23* | Matrix Metallopeptidase 23 |
| *MMP-24* | Matrix Metallopeptidase 24 |
| *MMP-25* | Matrix Metallopeptidase 25 |
| *MMP-26* | Matrix Metallopeptidase 26 |
| *MMP-27* | Matrix Metallopeptidase 27 |
| *MMP-28* | Matrix Metallopeptidase 28 |
| *MMP-3* | Matrix Metallopeptidase 3 |
| *MMP-7* | Matrix Metallopeptidase 7 |
| *MMP-8* | Matrix Metallopeptidase 8 |
| *MMP-9* | Matrix Metallopeptidase 9 |
| *MAPK* | p 38 MAP Kinase |
| *PAK-2* | P21 (RAC1) Activated Kinase 2 |
| *PRF* | perforin |
| *PIDD* | P53-Induced Death Domain Protein 1 |
| *PKA* | Protein kinase A |
| *PKCδ* | Protein kinase C delta |
| *PKCζ* | Protein kinase C zeta |
| *PP1* | Protein phosphatase 1 |
| *PP2A* | Protein phosphatase 2 |
| *PPP1CA* | Protein Phosphatase 1 Catalytic Subunit Alpha |
| *PTGER3* | Prostaglandin E Receptor 3 |
| *RAIDD* | CASP2 And RIPK1 Domain Containing Adaptor With Death Domain |
| *RIPK1* | Receptor Interacting Serine/Threonine Kinase 1 |
| *RIPK2* | Receptor Interacting Serine/Threonine Kinase 2 |
| *RSK2* | Ribosomal S6 Kinase 2 |
| *sIL-2r* | Serum soluble interleukin-2 receptor |
| *Src* | Proto-oncogene tyrosine-protein kinase |
| *TLR3* | Toll Like Receptor 3 |
| *TNF* | Tumor Necrosis Factor |
| *TNFRSF6* | Tumor Necrosis Factor Receptor Superfamily Member 6 |
| *TNFSF6* | Tumor necrosis factor ligand superfamily, member 6 |
| *XIAP* | X-Linked Inhibitor Of Apoptosis |

**Supplementary Figure 1.** Alignment of rare variants through mammalian species.


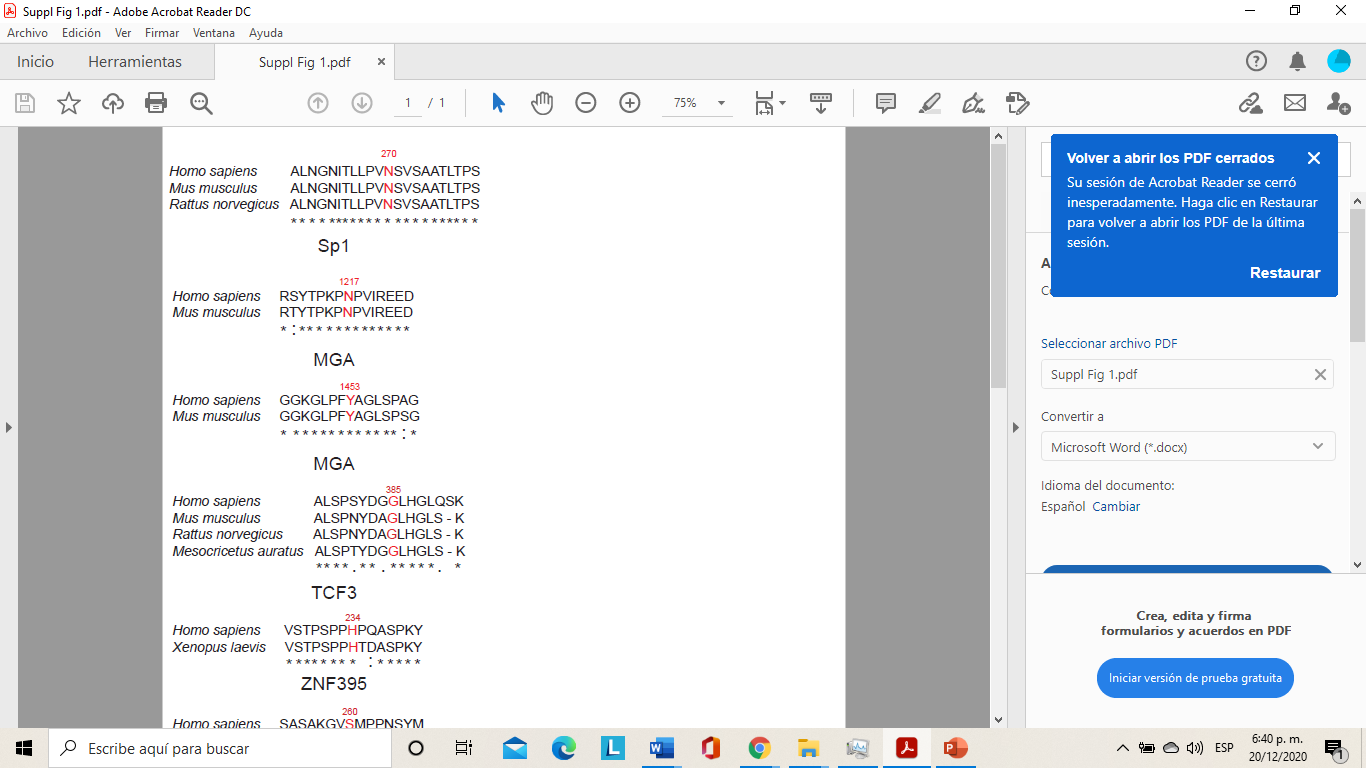

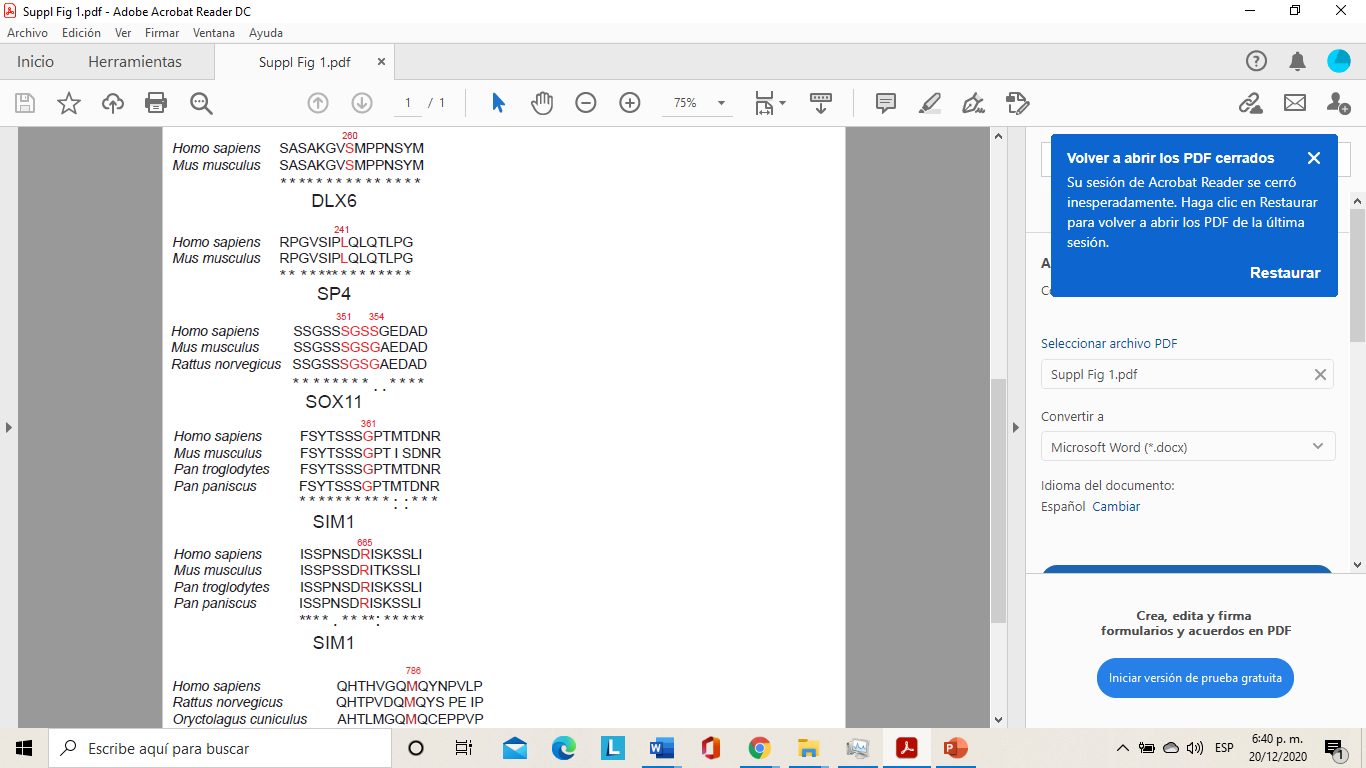

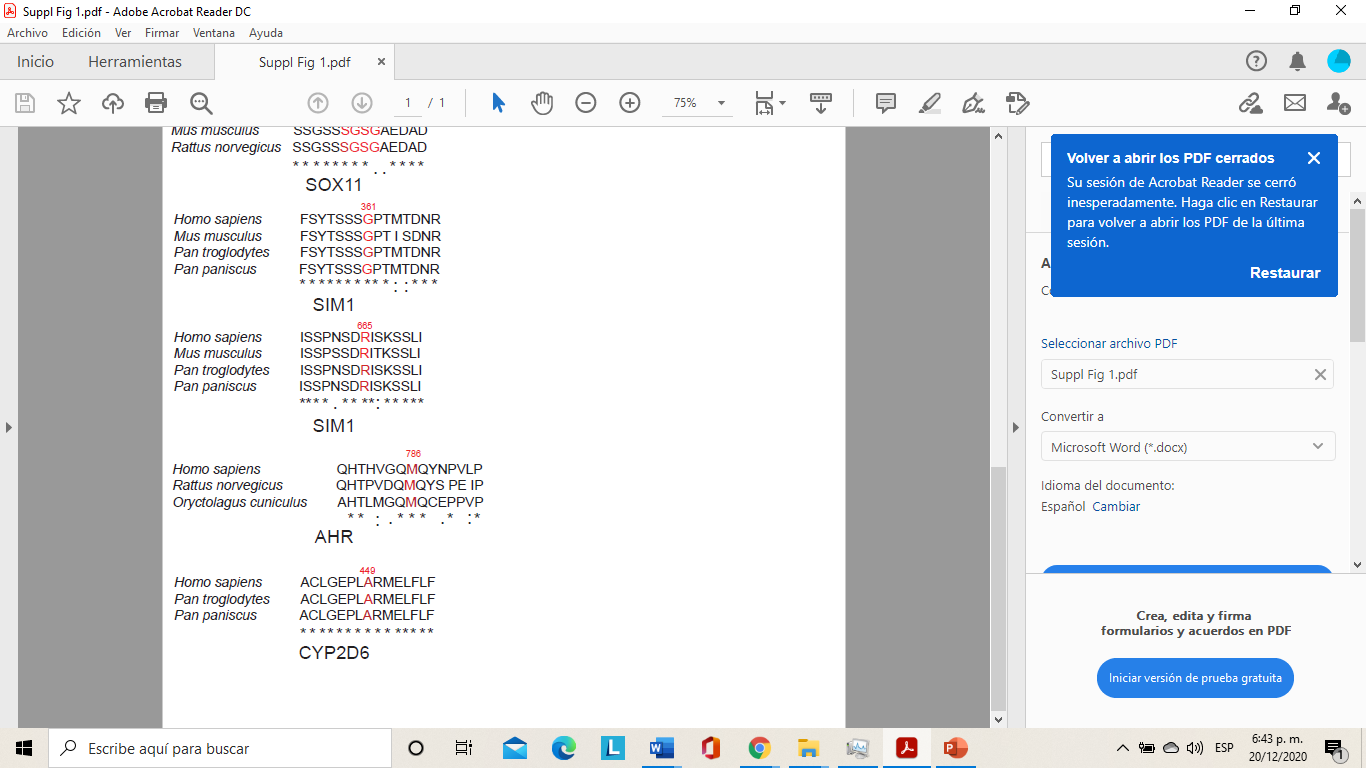

Supplement: Supplementary file 1 [file get_supplementary_file.php]
